# Supplementary material for: Concatenated Analysis Sheds Light on Early Metazoan Evolution and Fuels a Modern “Urmetazoon” Hypothesis
Source: PLoS Biol. 2009 Jan 27;7(1):e1000020. doi: 10.1371/journal.pbio.1000020 (PMC2631068; doi:10.1371/journal.pbio.1000020)
Supplement: Table S5 — (38 KB XLS) [file pbio.1000020.st005.xls]

## Sheet: Tabelle1
Supplementary Table 5. Disposition of PCR and sequencing of Placozoan and Cubozoan genes.
Primer name (Rokas et al., 2005)	target gene	Trichoplax adhaerens accession #	Placozoa sp. H2 accession #	Carybdea marsupialis accession #
TOA4	Cell division control protein 42 (CDC42)	FJ387001 *	FJ387011	-
TOA5	Ras-related nuclear protein (RAN)	FJ387005 *	-	-
TOA6	Eukaryotic translation initiation factor 2 (EIF2)	FJ387008 *	FJ387015	FJ387000 *
TOA9	Heat shock 70kDa protein 8, cyto. (HSP70-8)	FJ387002 *	FJ387012	-
TOA11	Heat shock 70kDa protein 9, mito.	FJ387003	-	-
TOA15	DNA-directed RNA Polymerase II beg.	FJ387016	-	-
TOA16	DNA-directed RNA Polymerase II middle	FJ387016	-	-
TOA25	Ribosomal protein S2 (RPS2)	FJ387006 *	FJ387014	FJ386999 *
TOA48	RNA polymerase III (RPOIII)	FJ387007 *	-	-
TOA62	Na,K-ATPase Alpha-subunit, beg. (ATP1a)	FJ387004 *	FJ387013	FJ386998 *
TOA65	Beta-tubulin (BTU)	FJ387017 *	FJ387010	-
* used for the phylogenetic analyses in this study.

## Sheet: Tabelle2
Primer	target gene	product for Trichoplax adhaerens	product for Placozoa sp. H2	product for Carybdea marsupialis
TOA4	Cell division control protein 42	+	+	-
TOA5	Ras-related nuclear protein	+	-	+
TOA6	Eukaryotic translation initiation factor 2	+	+	+
TOA9	Heat shock 70kDa protein,cytoplasmic	+	+	+
TOA10	Heat shock 70kDa protein, ER	+	-	-
TOA11	Heat shock 70kDa protein,mitochondrial	+	-	-
TOA13	Succinate deydrogenase iron-sulfur protein
TOA15	DNA-directed RNA Polymerase II beg.
TOA16	DNA-directed RNA Polymerase II middle
TOA17	DNA-directed RNA Polymerase II end
TOA21	Ribosomal protein 5
TOA25	Ribosomal protein 2
TOA33	Actin-related proteinArp2/3 complex
TOA48	RNA polymerase III
TOA53	DNA replication license factor
TOA56	Chaperonin complex component,TCP-1 delta subunit
TOA57	Chaperonin complex component,TCP-1 beta subunit
TOA59	P-type ATPase
TOA62	ATPase Alpha-subunit, beg.
TOA65	Beta-tubulin
TOA67	Heat shock 90kDa protein, beg.
TOA68	Heat shock 90kDa protein, end
